1 **Title:** Investigating the structure of Schizotypy through the “Multidimensional Schizotypy Scale” and  
2 “Oxford-Liverpool Inventory”: an Exploratory network analysis approach in the healthy population.

3  
4 **Authors:**

5  
6 Pierfrancesco Sarti<sup>1,2, †</sup>, Werner Surbeck<sup>2, †</sup>, Giacomo Cecere<sup>2</sup>, Noemi Dannecker<sup>3,4</sup>, Rahel  
7 Horisberger<sup>2</sup>, Nils Kallen<sup>2</sup>, Wolfgang Omlor<sup>2</sup>, Anna Steiner<sup>2</sup>, Dario Palpella<sup>5,2</sup>, Nicolas Langer<sup>4</sup>,  
8 Johanna M.C. Blom<sup>1,6, \*</sup>, Philipp Homan<sup>2,7, \*</sup>

9  
10  
11 **Affiliations:**

12  
13 <sup>1</sup>Department of Biomedical, Metabolic and Neural Sciences, University of Modena and Reggio Emilia,  
14 Modena, Italy

15 <sup>2</sup>Department of Adult Psychiatry and Psychotherapy, Psychiatric Hospital, University of Zurich, Zurich,  
16 Switzerland

17 <sup>3</sup>Neuropsychology Unit, Department of Neurology, University Hospital of Zurich, Zurich, Switzerland

18 <sup>4</sup>Department of Psychology, University of Zurich, Zurich, Switzerland

19 <sup>5</sup>Department of Medicine and Surgery, University of Milano-Bicocca, Monza, Italy

20 <sup>6</sup>Centre for Neuroscience and Neurotechnology, University of Modena and Reggio Emilia, Modena, Italy

21 <sup>7</sup>Neuroscience Center Zurich, University of Zurich and ETH Zurich, Zurich, Switzerland

22  
23  
24 † **Shared first Author** - These authors contributed equally to this work.

25  
26  
27 **\* Corresponding Authors:**

28 Prof. Dr. med. univ. Philipp Homan, PhD

29 Stv. Klinikdirektor und Chefarzt

30 Psychiatrische Universitätsklinik Zürich, Erwachsenenpsychiatrie und Psychotherapie

31 Lenggstrasse 31, 8032 Zürich, Schweiz

32 E-mail: [philipp.homan@bli.uzh.ch](mailto:philipp.homan@bli.uzh.ch)

33  
34 Prof. Johanna M.C. Blom, PhD

35 Department of Biomedical, Metabolic and Neural Sciences

36 University of Modena and Reggio Emilia, Via Giuseppe Campi, 287, 41125 Modena, Italy

37 E-mail: [joan.blom@unimore.it](mailto:joan.blom@unimore.it)

38  
39  
40 **Word Count:** 4445 excluding references

41  
42  
43  
44 **Keywords:** Schizophrenia spectrum disorder, Exploratory graph analysis, MSS, O-LIFE, network  
45 psychometric, network model

46 **NOTE:** This preprint reports new research that has not been certified by peer review and should not be used to guide clinical practice.

47

48 **Abstract**

49

50 **Background:** Schizophrenia spectrum disorders and schizotypy share traits across positive, negative, and  
51 disorganized domains. Instruments like MSS and O-LIFE provide insights into these dimensions. Despite  
52 challenges posed by cultural variations and measurement methodologies, these instruments offer nuanced  
53 perspectives on the spectrum of schizotypy, spanning from its expression as a personality trait to its potential  
54 implications in clinical settings. **Methods:** Through an Exploratory Graph Analysis (EGA) applied to a sample  
55 of 1059 healthy subjects, we compare the resulting networks with the original factorial structure of the two  
56 questionnaires and explore how each one conceptualizes schizotypy. Comparing both models quantitatively  
57 and qualitatively these models, we seek to elucidate the unique insights provided by each instrument regarding  
58 the spectrum of schizotypy as a personality trait. **Results:** EGA analyses unveiled a three-dimensional  
59 structure plus an additional one consisting of items related to the concept of "Disconnection". Confirmatory  
60 factor analysis showed this four-dimensional model outperformed others. High reliability and strong factor  
61 saturation were observed for all four factors.

62 O-LIFE's EGA revealed a complex structure, refined to four factors removing items with low fitting indices  
63 from the scale. Confirmatory analysis validated a final model with robust reliability and well-defined factor  
64 structures across the new "Cognitive and Behavioural Disorganization", "Introversion", "Unusual  
65 Experiences", and "Environmental Pressure" factors.

66 **Conclusions:** This study improves the understanding of schizotypy by proposing new MSS and O-LIFE factor  
67 structures via EGA. Both scales uniquely contribute to schizotypy assessment in healthy populations,  
68 warranting further research to validate and refine these new domains across diverse populations.

69

70

71

72

73

74

75

76

77

78

79

80

81

82

83

84

85

86

87

88

89

90

91

92

93

## 94 **1. Introduction**

95

96 Schizophrenia spectrum disorders (SSD) are among the most severe mental illnesses globally, characterized  
97 by a high burden of disease and a significant negative effect on the individual's occupational, educational,  
98 social, and economic life (Crespo-Facorro et al., 2021). These disorders are broadly defined by altered and  
99 abnormal mental states over certain periods of time, characterised by symptom clusters including delusions  
100 and hallucinations, disorganised thinking and motor behaviour, negative symptoms such as apathy, anhedonia  
101 and blunted affect. The presentation of these symptoms varies from person to person and often co-occurs with  
102 other disorders, hindering a prompt and precise diagnosis (Tandon et al., 2013; Schultze-Lutter et al., 2019;  
103 Sarraf et al., 2022).

104

105 The notion of schizotypy, distinct from clinical SSD, has garnered significant attention in psychiatric research.  
106 Both schizotypy and SSD share traits and symptoms across the same domains — positive, negative, and  
107 disorganized. Unlike the episodic nature of SSD symptoms, these dimensions represent enduring  
108 characteristics in individuals' personal lives (Grant et al., 2018; Kwapil, Gross, Burgin, et al., 2018; Nelson et  
109 al., 2013).

110 Due to its combination of behavioural personality traits that can manifest also as pathological, it has been  
111 proposed as a potential endophenotype or "schizophrenia liability" (Grant, 2015; Lenzenweger, 2006, 2015)  
112 and has provided valuable insights into various schizophrenia-spectrum disorders and their underlying  
113 aetiologies (Barrantes-Vidal et al., 2015). By studying individuals expressing high schizotypy without clinical  
114 SSD, researchers have been able to identify both risk and resilience factors. This research has contributed to  
115 an enhanced understanding of SSD and the development of more effective intervention strategies (Barrantes-  
116 Vidal et al., 2015; Grant & Hennig, 2020).

117 However, debates surrounding the nature of Schizotypy persist; some argue for a taxonomic model that sees  
118 schizotypy as one end of the psychosis spectrum and therefore inherently pathological (Morton et al., 2017),  
119 while others propose a broader dimensional model that suggests that schizotypy is not necessarily associated  
120 with pathology (Grant et al., 2018). Claridge's fully dimensional model, for instance, proposes that schizotypy  
121 traits can be adaptive or maladaptive, implying a continuum between schizotypy as a personality trait having  
122 no psychopathological value up to a pathological manifestation of the symptoms (Mohr & Claridge, 2015).  
123 This view has paved the way for the inclusion of non-clinical populations in schizotypy research, shedding  
124 light on the dynamic nature of these traits (Debbané & Barrantes-Vidal, 2015).

125

126 Despite these challenges and differences, schizotypy research continues to provide invaluable insights into the  
127 complex interplay between personality and psychopathology. In addition, the current clinical classification  
128 systems of DSM-5 and ICD-11 have some major limitations because they fail to integrate new models of  
129 psychopathology with advanced research methodologies (Kendell & Jablensky, 2003; Wright et al., 2013;

130 Cohen et al., 2018; Hengartner & Lehmann, 2017; Kotov et al., 2018) leaving the definition of these disorders  
131 obsolete or often misdiagnosed as schizophrenia (Schultze-Lutter et al., 2019).

132 To validly measure schizotypy as a stable, non-pathologic personality structure, psychometric instruments are  
133 preferred; in particular self-reports that are cost-effective and non-invasive (Barrantes-Vidal et al., 2015; O. J.  
134 Mason, 2015, p. 2).

135 However, the theoretical framework behind these instruments significantly influences their content and the  
136 validity of their assessments (Fonseca-Pedrero et al., 2021; Grant et al., 2018; Kwapil, Gross, Burgin, et al.,  
137 2018): some instruments target clinical populations with a focus on pathological aspects, while others aim to  
138 measure schizotypy as a broader, dimensional construct.

139

140 For instance, the Wisconsin Schizotypy Scales, based on Meehl's taxonomic framework, consists of four scales  
141 (J. P. Chapman et al., 1995; L. J. Chapman et al., 1976, 1978, 1980; Eckblad & Chapman, 1983). While it  
142 targets clinical populations, it may not fully cover the disorganized dimension or negative aspects schizotypy,  
143 such as alogia or avolition.

144 Similarly, the Schizotypal Personality Questionnaire developed by Adrian Raine (1991) (Raine, 1991) and  
145 measures aspects of SPD through nine subscales but inadequately addresses the disorganized dimension.

146 Two further scales, the Multidimensional Schizotypy scale (MSS) and the Oxford-Liverpool inventory for  
147 feelings and experiences (O-LIFE), offer comprehensive coverage of the three established dimensions of  
148 Schizotypy and demonstrate robust psychometric properties (Grant et al., 2013; Oezgen & Grant, 2018;  
149 Christensen et al., 2019; Kemp et al., 2020; Polner et al., 2021). These scales offer researchers comprehensive  
150 tools to explore the nuanced interplay between personality traits and psychopathology.

151 The MSS, aligned with the taxonomic view of schizotypy, explores experiences akin to symptoms of SSD but  
152 in milder form (Kwapil, Gross, Silvia, et al., 2018). In contrast, the O-LIFE adopts a personality-oriented  
153 approach, where high manifestations of Schizotypy extend beyond the clinical spectrum (O. Mason &  
154 Claridge, 2006).

155 These instruments thus provide diverse viewpoints on schizotypy, offering new insights into its dimensional  
156 structure and potentially shedding light on SSD (Grant et al., 2018).

157 Given that cultural influences can significantly impact schizotypal traits and experiences, it is crucial to assess  
158 the structural equivalence of these measures across diverse populations. This enhances our understanding of  
159 the universal aspects of Schizotypy (Fonseca-Pedrero et al., 2014; Cohen et al., 2015; Fonseca-Pedrero et al.,  
160 2015; Barron, 2017). Authors emphasize the importance of replicating the factorial structure of these  
161 instruments across different cultural and linguistic contexts, using both clinical and non-clinical samples  
162 (Kwapil, Gross, Silvia, et al., 2018; Kwapil, Gross, Burgin, et al., 2018). Issues related to translation may alter  
163 the interpretation of questionnaire items, potentially affecting response patterns and the reliability of the  
164 instrument (Grant et al., 2013). Moreover, as psychopathologies and personality are non-crystallised constructs  
165 that evolve with the passage of time and the ability to adapt to an increasingly complex environment, there is

166 a constant need to incorporate new statistical methodologies that better capture this fluidity (Achterhof et al.,  
167 2022; Onchev, 2021).

168

169 Network psychometrics is a swiftly advancing field applied to various psychopathological constructs,  
170 including Schizotypy (Christensen et al., 2018; Fonseca-Pedrero et al., 2018). This approach views  
171 psychopathological constructs as complex systems arising from interactions between their constituent elements  
172 (symptoms, internal and external factors) (Borsboom & Cramer, 2013; Schmittmann et al., 2013).

173 The network theory of psychopathology proposes that symptoms can reinforce each other, can be influenced  
174 by factors such as biological, environmental, and social mechanisms, and can lead to self-sustaining states that  
175 are difficult to modify (Borsboom, 2017). This theory supports current views on Schizotypy as a latent liability  
176 for schizophrenia spectrum disorders, where interactions with several factors may facilitate the disorder  
177 transition (A. Isvoranu et al., 2016; A.-M. Isvoranu et al., 2017; Lenzenweger, 2018).

178 In the field Network analysis and modelling, the Exploratory Graph Analysis (EGA) offers a novel approach  
179 to uncovering dimensions within psychometric instruments (van Borkulo et al., 2014; Borsboom, 2017; H. F.  
180 Golino & Epskamp, 2017). EGA employs a Gaussian Graphical Model, computed using the graphical least  
181 absolute shrinkage and selection operator (lasso) (Friedman et al., 2008; Strobl et al., 2012; Epskamp et al.,  
182 2018). The walktrap community detection algorithm then identifies network dimensions by performing  
183 "random walks" from one node to another, forming communities based on densely connected edges (Pons &  
184 Latapy, 2005). Because of the implementation of this algorithm, EGA's dimensions are determined without  
185 researcher bias, offering an advantage over other exploratory dimension reduction methods by providing  
186 immediately interpretable content and dimensions without needing to interpret component loadings. EGA has  
187 shown comparable or superior accuracy in identifying dimensions compared to other methods such as principal  
188 component analysis and factor analysis (H. Golino et al., 2020; H. F. Golino & Demetriou, 2017; H. F. Golino  
189 & Epskamp, 2017) and has effectively replicated factor analytic findings and discovered new construct  
190 dimensions(Bell & O'Driscoll, 2018) .

191 To our knowledge, no study has yet conducted an Exploratory Graph Analysis (EGA) comparing the factorial  
192 structures of two schizotypal instruments within the same sample, contrasting their similarities and differences  
193 with the original models. This represents critical area for further research.

194 Therefore, the main objective of this study is to validate the factorial structures of the Multidimensional  
195 Schizotypy Scale (MSS) and the Oxford-Liverpool Inventory of Feelings and Experiences (O-LIFE) in a large  
196 German-speaking non-clinical sample. We aim to compare this structure with those identified by Exploratory  
197 Factor Analysis (EFA).

198 Furthermore, through interpreting these resulting models, our study will facilitate a qualitative comparison of  
199 how each questionnaire conceptualizes schizotypy and the unique insights each instrument offers.

200

201

202

## 203 2. Methods

204

### 205 2.1 Participants

206 The participants were recruited via an online survey aimed at identifying potential candidates for a  
207 comprehensive study at the University Hospital of Psychiatry Zurich (PUK). For further details on the study,  
208 please visit the VELAS website (<https://homanlab.github.io/velas/>). The survey included questions about  
209 demographics, MRI safety, the German versions of the MSS and O-LIFE, and the German version of the  
210 Childhood Trauma Questionnaire(Wingenfeld et al., 2010; [*The German version of the Childhood Trauma*  
211 *Questionnaire (CTQ): preliminary psychometric properties*] - PubMed, s.d.). Completing the survey took  
212 approximately 20 to 30 minutes. The current study analysis focused exclusively on the MSS and O-LIFE  
213 results.

214 Due to the main study's specific research requirements, participants had to meet several criteria to be  
215 considered eligible:

- 216 - they needed to be healthy without any psychiatric or neurological conditions,
- 217 - aged between 18 and 40 years,
- 218 - right-handed,
- 219 - proficient in German.

220 The online survey was widely distributed across various platforms, including Swiss university and college  
221 marketplaces, public forums like RonOrp, the "PSYCH-Pool" of the University of Zurich (server with  
222 registered persons who want to participate in studies), the psychology students' association (FAPS) mailing  
223 list, tweets from the research team, and direct outreach to various educational institutions. This approach aimed  
224 to attract individuals with diverse educational and social backgrounds.

225 Participants who were selected and participated in the main study received a compensation of 150 Swiss francs,  
226 while those not selected after completing the survey received no compensation.

227 A total of 1059 participants completed the entire questionnaire between April 2021 and March 2024. The  
228 questionnaire was converted into an online format using the Enterprise Feedback Suite and since the  
229 demographic, MSS, and O-LIFE items were programmed as forced-choice questions, no missing values were  
230 present in the dataset. The consent of the healthy subjects to the data processing was provided at the beginning  
231 of the compilation of the test battery. They had to read the protocol and subsequently tick the items of  
232 understanding the study and analysing the collected data.

233 Without this, the questionnaires could not be accessed.

234 Participants were instructed before each instrument (MSS or O-LIFE) that the following statements or  
235 questions cover a broad range of attitudes, thoughts, experiences, preferences, and beliefs, and they should  
236 respond as honestly as possible. They were also informed that there were no right or wrong answers and that  
237 they should answer in a way that best reflects themselves.

238

239



## 240        **2.2 Materials**

241

242        The MSS and O-LIFE were used in their German versions, translated by bilingual researchers from the  
243        International Consortium of Schizotypy Research (ICSR) (<https://srconsortium.org>), and have been utilized in  
244        other studies(Grant et al., 2013; Nenadić et al., 2021).

245        The MSS consists of 77 Yes-or-No items, divided into subscales: 26 items in both the “Negative” and  
246        “Positive” subscales, and 25 items in the “Disorganised” subscale. Previous studies with larger samples have  
247        shown the internal consistency of these subscales to be good to excellent, with binary adjusted alpha  
248        coefficients ranging from 0.87 to 0.95 in English-speaking samples, and from 0.78 to 0.89 in German-speaking  
249        samples (Kwapil, Gross, Burgin, et al., 2018; Kwapil, Gross, Silvia, et al., 2018; Nenadić et al., 2021).

250        The O-LIFE comprises 104 Yes-or-No items, with 30 items in the “Unusual Experiences” (UnEx) subscale  
251        describing perceptual aberrations, magical thinking, and hallucinations, 27 in the “Introvertive Anhedonia”  
252        (IntA), a subscale that describe a lack of enjoyment from social and physical sources of pleasure, as well as  
253        avoidance of intimacy, 24 in the “Cognitive Dysregulation” (CogDis) subscale that taps aspects of poor  
254        attention, concentration, social anxiety and poor decision-making, and 23 in the “Impulsive nonconformity”  
255        (ImpNon) subscale which contains items describing anti-social, eccentric and impulsive forms of behaviour,  
256        often suggesting a lack of self-control .

257        Alpha coefficients for these subscales were found to be between 0.77 and 0.89 in studies by Mason and  
258        Claridge (2006) (O. Mason & Claridge, 2006), and between 0.68 and 0.88 in a German-speaking sample by  
259        Grant et al. (2013)(Grant et al., 2013).

260        Notably, the lowest alpha coefficient was in the ImpNon subscale, whereas the other three subscales (UnEx,  
261        IntA, CogDis) had coefficients above 0.8, indicating good to excellent internal consistency.

262

263

## 264        **2.3 Statistical Analysis**

265        The data were analysed quantitatively to extrapolate descriptive information from the sample using mean,  
266        standard deviation and percentages.

267

268        In order to choose the best correlation method for constructing the matrices then used for the Exploratory  
269        Graph Analysis, we conducted the Jenrich’s Test (Atiany & Sharif, 2018) comparing the Fiml (Full information  
270        Maximum Likelihood) correlations used in the article by Christensen et al. 2019 (Christensen et al., 2019),  
271        Spearman's correlations, since these of the MSS and O-LIFE are categorical variables and, finally, the Phi  
272        (mean square contingency coefficient) coefficients used in the specific case in which the variables are  
273        categorical and dichotomous. The latter is interpreted as a Pearson's 'p'.

274        We utilised the EGA package(H. F. Golino & Epskamp, 2017) in R to perform the Exploratory Graph Analysis,  
275        employing first the qgraph to apply the glasso algorithm (Epskamp et al., 2012) and then igraph(Csardi &  
276        Nepusz, 2005) to compute the walktrap clustering methods (Pons & Latapy, 2005). The glasso method was

277 estimated using a penalised maximum likelihood solution based on the Extended Bayesian Information  
278 Criterion – EBIC (Chen & Chen, 2008; Epskamp et al., 2018).

279

280 The representation of the networks was done using the 'qgraph' package and analyses were also carried out to  
281 calculate the centrality indices. Betweenness centrality was used as a value for the size of the individual  
282 nodes(Bringmann et al., 2019).

283

284 If the number of factors found was excessively large or if issues emerged in the correlations of individual items  
285 from the representation, an Exploratory Factor Analysis was conducted. First, a Kaiser-Meyer-Olkin test  
286 (Kaiser, 1974) and Bartlett's test of sphericity(Bartlett, 1950) were performed. Then, if items had inadequate  
287 values of Measure of Sample Adequacy (MSA), the EGA would be conducted again without those items.

288

289 A Confirmatory Factor Analysis was then conducted to compare the resulting models with the original ones.  
290 The correlation matrices of the individual factors of each model were estimated using the WLSMV (diagonally  
291 weighted least squares estimator)(Muthén, 1984). Each model was fitted using the 'lavaan' package(Rosseel,  
292 2012) in R.

293 The fitting of the models obtained were compared to each other using the Satorra-Bentler chi-square  
294 test(Satorra & Bentler, 2010) and qualitatively using: comparative fit index (CFI), standardised root mean  
295 residual (SRMR), root mean square error of approximation (RMSEA) and Tucker-Lewis Index (TLI).

296 Based on the results, the best model was chosen, and the individual factors were taken and reliability measures  
297 such as McDonalds' Omega(McDonald, 1999) and Cronbach's Alpha(Cronbach, 1951) were calculated.

298

## 299 **2.4 R code and materials sharing**

300 All the R code with results and graph is available as Supplementary Material.

301

302

303

304

305

306

307

308

309

310

311

312

313



314 **3. Results**

315

316 The demographic information concerning the sample of 1059 healthy subjects who participated in the study is  
317 in Table 1. Frequencies, means, standard deviations and percentages are indicated.

318

| Demographic table              | Total        |       | Males        |       | Females      |        | Others       |       |
|--------------------------------|--------------|-------|--------------|-------|--------------|--------|--------------|-------|
|                                | n°           | %     | n°           | %     | n°           | %      | n°           | %     |
| <b>N sample</b>                | 1059         | 100   | 300          | 28.33 | 757          | 71.48  | 2            | 0.19  |
| <b>Age: mean and sd</b>        | 24.78 ± 4.48 |       | 25.52 ± 4.59 |       | 24.46 ± 4.37 |        | 25.44 ± 4.83 |       |
| <b>Education</b>               |              |       |              |       |              |        |              |       |
| No grade                       | 3            | 0.28  | 1            | 0.33  | 2            | 2.80   | 0            | 0.00  |
| Secondary School               | 40           | 3.78  | 13           | 4.33  | 26           | 36.37  | 1            | 50.00 |
| Apprenticeship                 | 224          | 21.15 | 71           | 23.67 | 153          | 214.05 | 0            | 0.00  |
| Technical School               | 20           | 1.89  | 5            | 1.67  | 15           | 20.98  | 0            | 0.00  |
| Matura                         | 362          | 34.18 | 99           | 33.00 | 263          | 367.94 | 0            | 0.00  |
| Higher Technical Institute     | 43           | 4.06  | 9            | 3.00  | 34           | 47.57  | 0            | 0.00  |
| University of applied sciences | 74           | 6.99  | 28           | 9.33  | 46           | 64.35  | 0            | 0.00  |
| University                     | 289          | 27.29 | 72           | 24.00 | 216          | 302.18 | 1            | 50.00 |
| Other                          | 4            | 0.38  | 2            | 0.67  | 2            | 2.80   | 0            | 0.00  |

319 **Table 1:** demographic variables of the population. The breakdown of the variable Education was made according to the  
320 Swiss educational system.

321 Information on it can be found at <https://www.berufsberatung.ch/dyn/show/2800>. We also specify that some categories  
322 include more than one type of studies: secondary school (type A, B, C); Apprenticeship (Federal Vocational Certificate  
323 (EBA), Federal Certificate of Competence (EFZ) with/without matura, HPF); Technical school (with/without Matura);  
324 Matura (grammar school, adult matura, passerelle); both types of University include Bachelor, Master, Promotion).

325

326 For both questionnaires, the correlation matrices used for the EGA contained Spearman correlations. Jennrich's  
327 tests were not significant, so there no difference can be assumed between the correlation matrices using Phi,  
328 Spearman or Fiml. Spearman was preferred as the resulting matrix provided one more significant digit.

329

330 **3.1 MSS model**

331

332 EGA analyses revealed a three-dimensional structure in the sample reflecting the division of positive, negative  
333 and disorganisation symptoms. The positive and disorganisation dimensions have a higher density of  
334 connections between them than the negative domain. Of all the items, eight of them were wrongly included in

335 the positive domain by the EGA: seven of them were part of the disorganisation factor and one of the negative  
336 factor. The specific items are listed below:

- 337 - NEG1: I have always preferred to be disconnected from the world
- 338 - DIS06: When people ask me a question, I often do not understand what they are asking
- 339 - DIS30: I often find that when I talk to people, I do not make any sense to them
- 340 - DIS42: I often feel so disconnected from the world that I am not able to do things
- 341 - DIS45: I am very often confused about what is going on around me
- 342 - DIS51: People find my conversations to be confusing or hard to follow
- 343 - DIS69: I have trouble following conversations with others
- 344 - DIS75: It is usually easy for me to follow conversations

345

346 All these items share a common theme related to "disconnection" from the world or difficulties in  
347 understanding or being understood by others. In Figure 1, these items are visually separated from the others,  
348 forming a distinct fourth domain we named "Disconnection". The size of each node in the figure also reflects  
349 its "Betweenness" centrality value. This index indicates the importance of these nodes as "gatekeepers" within  
350 the network, as they frequently lie on the shortest paths between other nodes.

351

352 Subsequently, a CFA analysis was conducted to evaluate the fit of several models, the original scale model, the  
353 three-factor model identified by the EGA, and a third model that includes a separate factor for the items  
354 classified as misfits. The indices of interest are shown below:

- 355 - Original model: Chi-square: 4899.17; df: 2846; SRMR: 0.123; CFI: 0.979; RMSEA: 0.026; TLI: 0.978
- 356 - EGA model with 3 dimensions: Chi-square: 5082.16; df: 2846; SRMR: 0.124; CFI: 0.977; RMSEA:  
357 0.027; TLI: 0.976
- 358 - EGA model with 4 dimensions: Chi-square: 4680.91; df: 2843; SRMR: 0.120; CFI: 0.981; RMSEA:  
359 0.025; TLI: 0.981

360

361 The Satorra-Bentler tests performed between the original, three-dimensional EGA model (with misclassified  
362 items) and the four-dimensional EGA model were not significant, indicating that there is no difference between  
363 the three results.

364

365 However, the four-dimensional model obtains better fitting values than the other two; furthermore: the  
366 Negative factor exhibits high internal consistency ( $\text{Alpha} = 0.85$ ) and strong general factor saturation ( $\text{Omega}$   
367  $\text{Total} = 0.87$ ). Similar to the negative factor, the Positive factor shows high reliability ( $\text{Alpha} = 0.85$ ) and strong  
368 general factor saturation ( $\text{Omega Total} = 0.87$ ).

369 The Disorganised factor demonstrates excellent reliability ( $\text{Alpha} = 0.92$ ) and a strong general factor saturation  
370 ( $\text{Omega Total} = 0.93$ ).

371 Finally, the Disconnected factor exhibits good reliability ( $\text{Alpha} = 0.74$ ), a lower general factor saturation  
372 ( $\text{Omega Total} = 0.81$ ) than the others but still considered good as a substantial portion of the variance is due to  
373 common factors, suggesting good internal consistency.

374

375 **Figure 1:** MSS network representing the three factors identified by the EGA and the green group/factor  
376 “Disconnection”, called such following the analysis of the individual items. The size of the nodes reflects the  
377 Betweenness Centrality value. The green edges represent positive Spearman correlations.

378

### 379 **3.2 O-LIFE model**

380

381 The first EGA analysis on the O-LIFE questionnaire showed a 13-factor structure whose representation, using  
382 the four subscales of the test (Figure 2), revealed multiple nodes that were either uncorrelated or connected  
383 two by two. Moreover, the factor 'Impulsive Nonconformity' is the one that least maintains a unitary and  
384 separate structure, spreading out among the others.

385 For possible confounding effects and to reduce the number of factors, an Exploratory Factor Analysis was  
386 conducted.

387 The Kaiser-Meyer-Olkin test, although giving an Overall MSA of 0.9, revealed that seven items had values  
388 below 0.7 and ten others between 0.7 and 0.8.

389 The Parallel Analysis performed with tetrachoric correlations identified four main factors. Looking at the  
390 individual loadings several items had high positive and/or negative correlations with more than one factor at  
391 the same time.

392

393 **Figure 2:** O-LIFE network identified by the EGA separating the nodes with the four subscales proposed by  
394 the model of Mason and Claridge (2006).

395

396 Thus, items with a Measure of Sampling Adequacy of less than 0.7 (middling) were first removed from the  
397 dataset, resulting in a reduction in the number of factors from 13 to 9, and then also those with a value between  
398 0.7 and 0.8 (middling), resulting in a total of 4 factors. The resulting network can be observed in Figure 3.

399 Confirmatory Factor Analysis was performed for the three models: original model with all items, model  
400 obtained with Exploratory Factor Analysis and the 4-dimensional model with 87 items (after removing those  
401 with low MSA).

402 The results of the fitting of each model are shown in Table 2. The model obtained after removing 17 items  
403 (final model) from the questionnaire turns out to be the one with better indices. Furthermore, the Satorra-  
404 Bentler test was significant when crossing the final model with the other two in both cases:

405 - EGA model vs. Original: Chi-squared difference = 2637; Df difference: 1496;  $p = 2.2 \times 10^{-16}$

406 - EGA model vs. EFA model: Chi-squared difference = 2454; Df difference: 1598;  $p = 2.2 \times 10^{-16}$

407 After analysing the new item groups, two remained stable and similar to the original model (Introverted  
408 Anhedonia, now Introversion, and Unusual Experiences) while the other two were renamed to (Cognitive and  
409 Behavioural Disorganization and Environmental Pressure).

410

411 The reliability analysis for the four variables — Cognitive and Behavioural Disorganization, Introversion,  
412 Unusual Experiences, and Environmental Pressure — indicates robust internal consistency and well-defined  
413 factor structures. The first one shows high reliability with an alpha of 0.88 and an omega total of 0.89, alongside  
414 significant contributions from both general and group factors. Introversion is also reliable, evidenced by an  
415 alpha of 0.82 and an omega total of 0.83, with the general factor explaining a substantial portion of the variance.  
416 Unusual Experiences has strong reliability, with an alpha of 0.86 and an omega total of 0.87, indicating that  
417 both the general factor and group factors are important. Environmental Pressure, while slightly lower in  
418 reliability, still demonstrates good consistency with an alpha of 0.70 and an omega total of 0.75, dominated by  
419 the general factor. The model fits, as indicated by RMSEA values below 0.05 for all variables, suggest that the  
420 models are appropriate and explain a considerable amount of the variance. Correlations of scores with factors  
421 and multiple R square values are high for the general factor, confirming the adequacy of the factor score  
422 estimates. Despite some negative values in the minimum correlations for group factors, the overall reliability  
423 and factor structures are solid, ensuring the scales are reliable and effectively capture the intended constructs.

424

425 **Figure 3:** O-LIFE network representing the three factors identified by the EGA. The size of the nodes reflects  
426 the Betweenness Centrality value. The green edges represent positive Spearman correlations, red edges are  
427 negative.

428

| Measure        | Chi-squared | df   | SRMR  | CFI   | RMSEA | TLI   |
|----------------|-------------|------|-------|-------|-------|-------|
| Original model | 11486.318   | 5144 | 0.098 | 0.934 | 0.034 | 0.933 |
| EFA model      | 11543.169   | 5246 | 0.097 | 0.936 | 0.034 | 0.935 |
| EGA model      | 6789.411    | 3648 | 0.089 | 0.965 | 0.029 | 0.965 |

429 **Table 2:** This summarizes the fit measures for each model evaluated (Original, Exploratory Factor Analysis, and EGA  
430 done with 87 items), including chi-square, degrees of freedom (df), standardized root mean square residual (SRMR),  
431 comparative fit index (CFI), root mean square error of approximation (RMSEA), and the Tucker-Lewis index (TLI).

432

433

434

435

436

437

438

439

440

#### 441 **4. Discussion**

442

443 This study was the first to test the validity of the three- and four-factor structures, respectively, in the German  
444 versions of the MSS and O-LIFE, using a single sample of healthy subjects and applying EGA. The resulting  
445 models were compared with the original calibrations, and our results demonstrate that EGA, in addition to  
446 providing more information on the relationships between individual items, offers fittings that provide new  
447 insights into the structure of schizotypy.

448

449 Regarding the Multidimensional Schizotypy Scale, the EGA results revealed a three-dimensional structure  
450 (positive, negative, and disorganized schizotypy), consistent with the theoretical dimensions. Eight items were  
451 misclassified into the positive dimension. An analysis of these individual items indicated that they referred to  
452 aspects related to the person's disconnection from the world and/or difficulty in understanding conversations  
453 with others or not being understood during conversations, as well as confusion about what is happening around  
454 them. These items, identified in the new domain "disconnection," reflect symptoms of  
455 derealization/depersonalization, often found in schizotypy and/or the early stages of schizophrenia (Hamilton  
456 & Simeon, 2019). Interestingly, these items/nodes are located exactly between the Positive and Disorganized  
457 domains and, with their Betweenness values, serve a "mediating" function between the two (DIS06: 0.46;  
458 DIS30: 0.7; DIS42: 0.64; DIS69: 0.52). The separation of these items into a new domain did not lead to a  
459 decrease in the validity of the other three domains, which maintained excellent Alpha and Omega values;  
460 instead, it provided a new index to consider, which in turn can be expanded.

461 As found in previous studies (Christensen et al., 2018), the positive and negative domains are more distinct,  
462 with the disorganized domain acting as a link between the two. In addition, we did not observe any subdivision  
463 within the negative domain or the positive whereas in the study by Christensen et al., 2019, the 'Negative'  
464 domain was divided by Exploratory Graph Analysis into two distinct groups that were identified as affective  
465 anhedonia and social anhedonia (Christensen et al., 2019).

466 Although statistically there are no differences between the three models analysed for the MSS, the four-  
467 dimension model shows better indices and provides more detailed insights into a symptom that may serve as  
468 an early behavioural warning sign for schizotypal disorder and schizophrenia.

469

470 The Oxford-Liverpool Inventory of Feelings and Experiences required adjustments primarily due to its larger  
471 number of items and the lesser stability of certain factors already observed in the calibration of the German  
472 version. Notably, Figure 2 shows that Impulsive Nonconformity is an extremely disseminated domain, which  
473 is reflected in its unacceptable internal validity found in other studies (Grant et al., 2013).

474 The re-analysis of the individual MSAs of each item made it possible to exclude those that could lead to greater  
475 problems in modelling and play a role as confounding variables.

476 The final questionnaire comprised 87 items compared to the original 104, and the 4-factor model, made explicit  
477 in the analyses, was significantly better than both the original theoretical model and that identified by means  
478 of Exploratory Factor Analysis.

479 The domains "Unusual Experiences" and "Introvertive Anhedonia", now renamed "Introversion", correspond  
480 to those of the theoretical model. Two new domains were identified: one defined as "Cognitive and behavioural  
481 disorganisation", which was created by merging the items of "Impulsive nonconformity" and "Cognitive  
482 disorganisation", showing that rather than divided they can be considered in a symbiotic relationship.

483 The main point identified thanks to the Exploratory Graph Analysis is the domain of what we have called  
484 "Environmental pressure" which, although it remains graphically at a marginal point in the network, its nodes  
485 all have high Betweenness centrality values.

486

487 These items (six from the Cognitive disorganisation scale and one from the Impulsive nonconformity scale),  
488 all refer to the fear of being judged/wounded by others for the decisions or actions made. It clearly emerges  
489 how the environment and the opinion/judgment of others has an effect and acts as a conduit between  
490 Introversion and Disorganisation.

491 Carrying out a proper assessment of environmental aspects such as relationships and the degree of pressure  
492 felt by the person on his or her behaviour, can make it possible to discriminate whether such thinking/tracking  
493 may also be due to a misinterpretation by the individual, highlighting emotional deficits in the schizotypal  
494 personality (Martin et al., 2019).

495

496 Both tests demonstrated a stable four-factor structure and, while some domains can be compared with each  
497 other, they provide two different interpretations of schizotypy. The MSS clearly shows the dimensionality of  
498 the construct since the Positive and Negative domains remain well-separated, and Disorganization is more  
499 correlated with Positivity through the newly identified domain called Disconnection. Furthermore, this test  
500 presents a more robust and differentiated factor structure compared to the O-LIFE. The latter, referring to a  
501 "full-dimensional" model of Schizotypy(Goulding, 2004; O. Mason & Claridge, 2006; Pfarr et al., 2023) and  
502 aiming to include many more characteristics, like behavioural ones, is more complex and more easily  
503 influenced by demographic and cultural aspects. This characteristic must be considered in possible future  
504 calibrations of the questionnaire in other populations and cultures.

505

506 This study suffers from some limitations that should be mentioned. First, all the model analysed in this article  
507 presented out of range SRMR while all the other measures are considered good or optimal. Since the goodness  
508 of a model should not be based on a single fitting index, the models were presented as valid while considering  
509 the presence of some residuals responsible for an SRMR value greater than 0.8.

510 Secondly, it is conceivable that due to the extensive number of items in both instruments, participants could  
511 experience content overload, leading to decreased attention and potentially random responses. Finally, because  
512 this is a self-report assessment, certain inherent issues cannot be anticipated or prevented. For instance, it is



513 uncertain whether subjects respond truthfully to all items. Additionally, some responses may be influenced by  
514 social desirability bias, where subjects answer in a way they believe aligns with societal expectations.

515

## 516 **5. Conclusion**

517

518 This study advances the understanding of schizotypy by proposing possible new factor structures of the MSS  
519 and O-LIFE using Exploratory Graph Analysis. MSS's clear dimensionality and the addition of the  
520 disconnection domain offer a precise framework for identifying schizotypal traits. O-LIFE's revised model,  
521 with its focus on environmental influences, provides a comprehensive, though complex, interpretation of  
522 schizotypal characteristics. Both scales contribute uniquely to the assessment and understanding of schizotypy  
523 in healthy populations.

524

525 Future research should explore more in depth and rearrange the number of items of the new domains to assess  
526 and increase validity and stability of the new ones considering the possible differences in language and culture.

527

528

529

530

531

532

533

534

535

536

537

538

539

540

541

542

543

544

545

546

547

548

549

550 **Acknowledgements**

551 This research was supported by grants from the Brain & Behavior Research Foundation and the OPO  
552 Foundation. We gratefully acknowledge their financial assistance, which made this work possible.

553

554 **Financial support**

555 This work was supported by grants from the Brain & Behavior Research Foundation (Grant No. 28997) and  
556 the OPO Research Foundation (Grant No. 2020-0075) to Werner Surbeck.

557

558 **Ethical standards**

559 The authors assert that the protocol was approved by the local ethics committee (KEK-ZH 2020/01049) and  
560 that all procedures contributing to this work comply with the ethical standards of the relevant national and  
561 institutional committees on human experimentation and with the Helsinki Declaration of 1975, as revised in  
562 2008.

563

564 **Competing Interests**

565 The authors declare no competing interests

566

567

568

569

570

571

572

573

574

575

576

577

578

579

580

581

582

583

584

585

586

## 587 6. References

588

589 Achterhof, R., Kirtley, O. J., Schneider, M., Hagemann, N., Hermans, K. S. F. M., Hiekkaranta, A. P., Lecei,  
590 A., Decoster, J., Derom, C., De Hert, M., Gülöksüz, S., Jacobs, N., Menne-Lothmann, C., Rutten, B.  
591 P. F., Thiery, E., van Os, J., van Winkel, R., Wichers, M., & Myin-Germeys, I. (2022). General  
592 psychopathology and its social correlates in the daily lives of youth. *Journal of Affective Disorders*,  
593 309, 428–436. <https://doi.org/10.1016/j.jad.2022.04.147>

594 Atiany, D.-T., & Sharif, S. (2018). *New Statistical Test for Testing Several Correlation Matrices*.

595 Barrantes-Vidal, N., Grant, P., & Kwapil, T. R. (2015). The Role of Schizotypy in the Study of the Etiology of  
596 Schizophrenia Spectrum Disorders. *Schizophrenia Bulletin*, 41(suppl\_2), S408–S416.  
597 <https://doi.org/10.1093/schbul/sbu191>

598 Barron, D. (2017). *Schizotypy: A Multi-Country Study of Psychometrics, Socio-Cultural Influences, Cognitive*  
599 *Processes, and Electrophysiological Markers*.  
600 [https://www.semanticscholar.org/paper/Schizotypy%3A-A-Multi-Country-Study-of-](https://www.semanticscholar.org/paper/Schizotypy%3A-A-Multi-Country-Study-of-Psychometrics%2C-Barron/91c1519943c949579a351060abe302eb77c0116f)  
601 [Psychometrics%2C-Barron/91c1519943c949579a351060abe302eb77c0116f](https://www.semanticscholar.org/paper/Schizotypy%3A-A-Multi-Country-Study-of-Psychometrics%2C-Barron/91c1519943c949579a351060abe302eb77c0116f)

602 Bartlett, M. S. (1950). Tests of Significance in Factor Analysis. *British Journal of Statistical Psychology*, 3(2),  
603 77–85. <https://doi.org/10.1111/j.2044-8317.1950.tb00285.x>

604 Bell, V., & O’Driscoll, C. (2018). The network structure of paranoia in the general population. *Social*  
605 *Psychiatry and Psychiatric Epidemiology*, 53(7), 737–744. [https://doi.org/10.1007/s00127-018-1487-](https://doi.org/10.1007/s00127-018-1487-0)  
606 0

607 Borsboom, D. (2017). A network theory of mental disorders. *World Psychiatry*, 16(1), 5–13.  
608 <https://doi.org/10.1002/wps.20375>

609 Borsboom, D., & Cramer, A. O. J. (2013). Network Analysis: An Integrative Approach to the Structure of  
610 Psychopathology. *Annual Review of Clinical Psychology*, 9(Volume 9, 2013), 91–121.  
611 <https://doi.org/10.1146/annurev-clinpsy-050212-185608>

612 Bringmann, L. F., Elmer, T., Epskamp, S., Krause, R. W., Schoch, D., Wichers, M., Wigman, J. T. W., & Snippe,  
613 E. (2019). What do centrality measures measure in psychological networks? *Journal of Abnormal*  
614 *Psychology*, 128(8), 892–903. <https://doi.org/10.1037/abn0000446>

615 Chapman, J. P., Chapman, L. J., & Kwapil, T. R. (1995). Scales for the measurement of schizotypy. In A. Raine,  
616 S. A. Mednick, & T. Lencz (A c. Di), *Schizotypal Personality* (pp. 79–106). Cambridge University  
617 Press. <https://doi.org/10.1017/CBO9780511759031.006>

618 Chapman, L. J., Chapman, J. P., & Raulin, M. L. (1976). Scales for physical and social anhedonia. *Journal of*  
619 *Abnormal Psychology*, 85(4), 374–382. <https://doi.org/10.1037/0021-843X.85.4.374>

620 Chapman, L. J., Chapman, J. P., & Raulin, M. L. (1978). Body-image aberration in schizophrenia. *Journal of*  
621 *Abnormal Psychology*, 87(4), 399–407. <https://doi.org/10.1037/0021-843X.87.4.399>

622 Chapman, L. J., Edell, W. S., & Chapman, J. P. (1980). Physical Anhedonia, Perceptual Aberration, and  
623 Psychosis Proneness. *Schizophrenia Bulletin*, 6(4), 639–653. <https://doi.org/10.1093/schbul/6.4.639>

- 624 Chen, J., & Chen, Z. (2008). Extended Bayesian information criteria for model selection with large model  
625 spaces. *Biometrika*, *95*(3), 759–771. <https://doi.org/10.1093/biomet/asn034>
- 626 Christensen, A. P., Gross, G. M., Golino, H. F., Silvia, P. J., & Kwapil, T. R. (2019). Exploratory Graph  
627 Analysis of the Multidimensional Schizotypy Scale. *Schizophrenia Research*, *206*, 43–51.  
628 <https://doi.org/10.1016/j.schres.2018.12.018>
- 629 Christensen, A. P., Kenett, Y. N., Aste, T., Silvia, P. J., & Kwapil, T. R. (2018). Network structure of the  
630 Wisconsin Schizotypy Scales–Short Forms: Examining psychometric network filtering approaches.  
631 *Behavior Research Methods*, *50*(6), 2531–2550. <https://doi.org/10.3758/s13428-018-1032-9>
- 632 Cohen, A. S., Chan, R. C. K., & Debbané, M. (2018). Crossing Boundaries in Schizotypy Research: An  
633 Introduction to the Special Supplement. *Schizophrenia Bulletin*, *44*(suppl\_2), S457–S459.  
634 <https://doi.org/10.1093/schbul/sby089>
- 635 Cohen, A. S., Mohr, C., Ettinger, U., Chan, R. C. K., & Park, S. (2015). Schizotypy as An Organizing  
636 Framework for Social and Affective Sciences. *Schizophrenia Bulletin*, *41*(suppl\_2), S427–S435.  
637 <https://doi.org/10.1093/schbul/sbu195>
- 638 Crespo-Facorro, B., Such, P., Nylander, A.-G., Madera, J., Resemann, H. K., Worthington, E., O’Connor, M.,  
639 Drane, E., Steeves, S., & Newton, R. (2021). The burden of disease in early schizophrenia – a  
640 systematic literature review. *Current Medical Research and Opinion*, *37*(1), 109–121.  
641 <https://doi.org/10.1080/03007995.2020.1841618>
- 642 Cronbach, L. J. (1951). Coefficient alpha and the internal structure of tests. *Psychometrika*, *16*(3), 297–334.  
643 <https://doi.org/10.1007/BF02310555>
- 644 Csardi, G., & Nepusz, T. (2005). The Igraph Software Package for Complex Network Research. *InterJournal*,  
645 *Complex Systems*, 1695.
- 646 Debbané, M., & Barrantes-Vidal, N. (2015). Schizotypy From a Developmental Perspective. *Schizophrenia*  
647 *Bulletin*, *41*(suppl\_2), S386–S395. <https://doi.org/10.1093/schbul/sbu175>
- 648 Eckblad, M., & Chapman, L. J. (1983). Magical ideation as an indicator of schizotypy. *Journal of Consulting*  
649 *and Clinical Psychology*, *51*(2), 215–225. <https://doi.org/10.1037/0022-006X.51.2.215>
- 650 Epskamp, S., Cramer, A. O. J., Waldorp, L. J., Schmittmann, V. D., & Borsboom, D. (2012). qgraph: Network  
651 Visualizations of Relationships in Psychometric Data. *Journal of Statistical Software*, *48*, 1–18.  
652 <https://doi.org/10.18637/jss.v048.i04>
- 653 Epskamp, S., Waldorp, L. J., Möttus, R., & Borsboom, D. (2018). The Gaussian Graphical Model in Cross-  
654 Sectional and Time-Series Data. *Multivariate Behavioral Research*, *53*(4), 453–480.  
655 <https://doi.org/10.1080/00273171.2018.1454823>
- 656 Fonseca-Pedrero, E., Compton, M. T., Tone, E. B., Ortuño-Sierra, J., Paino, M., Fumero, A., & Lemos-  
657 Giráldez, S. (2014). Cross-cultural invariance of the factor structure of the Schizotypal Personality  
658 Questionnaire across Spanish and American college students. *Psychiatry Research*, *220*(3), 1071–  
659 1076. <https://doi.org/10.1016/j.psychres.2014.06.050>

- 660 Fonseca-Pedrero, E., Debbané, M., Rodríguez-Testal, J. F., Cohen, A. S., Docherty, A. R., & Ortuño-Sierra, J.  
661 (2021). Schizotypy: The Way Ahead. *Psicothema*, 33(1), 16–27.  
662 <https://doi.org/10.7334/psicothema2019.285>
- 663 Fonseca-Pedrero, E., Ortuño, J., Debbané, M., Chan, R. C. K., Cicero, D., Zhang, L. C., Brenner, C., Barkus,  
664 E., Linscott, R. J., Kwapil, T., Barrantes-Vidal, N., Cohen, A., Raine, A., Compton, M. T., Tone, E. B.,  
665 Suhr, J., Inchausti, F., Bobes, J., Fumero, A., ... Fried, E. I. (2018). The Network Structure of  
666 Schizotypal Personality Traits. *Schizophrenia Bulletin*, 44(suppl\_2), S468–S479.  
667 <https://doi.org/10.1093/schbul/sby044>
- 668 Fonseca-Pedrero, E., Ortuño-Sierra, J., Sierro, G., Daniel, C., Cella, M., Preti, A., Mohr, C., & Mason, O. J.  
669 (2015). The Measurement Invariance of Schizotypy in Europe. *European Psychiatry*, 30(7), 837–844.  
670 <https://doi.org/10.1016/j.eurpsy.2015.07.005>
- 671 Friedman, J., Hastie, T., & Tibshirani, R. (2008). Sparse inverse covariance estimation with the graphical lasso.  
672 *Biostatistics*, 9(3), 432–441. <https://doi.org/10.1093/biostatistics/kxm045>
- 673 Golino, H. F., & Demetriou, A. (2017). Estimating the dimensionality of intelligence like data using  
674 Exploratory Graph Analysis. *Intelligence*, 62, 54–70. <https://doi.org/10.1016/j.intell.2017.02.007>
- 675 Golino, H. F., & Epskamp, S. (2017). Exploratory graph analysis: A new approach for estimating the number  
676 of dimensions in psychological research. *PLOS ONE*, 12(6), e0174035.  
677 <https://doi.org/10.1371/journal.pone.0174035>
- 678 Golino, H., Shi, D., Christensen, A. P., Garrido, L. E., Nieto, M. D., Sadana, R., Thiyagarajan, J. A., &  
679 Martinez-Molina, A. (2020). Investigating the performance of exploratory graph analysis and  
680 traditional techniques to identify the number of latent factors: A simulation and tutorial. *Psychological*  
681 *Methods*, 25(3), 292–320. <https://doi.org/10.1037/met0000255>
- 682 Goulding, A. (2004). Schizotypy models in relation to subjective health and paranormal beliefs and  
683 experiences. *Personality and Individual Differences*, 37, 157–167.  
684 <https://doi.org/10.1016/j.paid.2003.08.008>
- 685 Grant, P. (2015). Is Schizotypy per se a Suitable Endophenotype of Schizophrenia? – Do Not Forget to  
686 Distinguish Positive from Negative Facets. *Frontiers in Psychiatry*, 6.  
687 <https://doi.org/10.3389/fpsy.2015.00143>
- 688 Grant, P., Green, M. J., & Mason, O. J. (2018). Models of Schizotypy: The Importance of Conceptual Clarity.  
689 *Schizophrenia Bulletin*, 44(suppl\_2), S556–S563. <https://doi.org/10.1093/schbul/sby012>
- 690 Grant, P., & Hennig, J. (2020). Schizotypy, social stress and the emergence of psychotic-like states—A case  
691 for benign schizotypy? *Schizophrenia Research*, 216, 435–442.  
692 <https://doi.org/10.1016/j.schres.2019.10.052>
- 693 Grant, P., Kuepper, Y., Mueller, E., Wielpuetz, C., Mason, O., & Hennig, J. (2013). Dopaminergic foundations  
694 of schizotypy as measured by the German version of the Oxford-Liverpool Inventory of Feelings and  
695 Experiences (O-LIFE)—A suitable endophenotype of schizophrenia. *Frontiers in Human*  
696 *Neuroscience*, 7. <https://doi.org/10.3389/fnhum.2013.00001>

- 697 Hamilton, H. K., & Simeon, D. (2019). Depersonalization/derealization disorder and schizotypal personality  
698 disorder. In *Psychosis, trauma and dissociation: Evolving perspectives on severe psychopathology*,  
699 *2nd ed* (pp. 241–256). Wiley Blackwell. <https://doi.org/10.1002/9781118585948.ch15>
- 700 Hengartner, M. P., & Lehmann, S. N. (2017). Why Psychiatric Research Must Abandon Traditional Diagnostic  
701 Classification and Adopt a Fully Dimensional Scope: Two Solutions to a Persistent Problem. *Frontiers*  
702 *in Psychiatry*, *8*. <https://doi.org/10.3389/fpsyt.2017.00101>
- 703 Isvoranu, A., Borsboom, D., van Os, J., & Guloksuz, S. (2016). A Network Approach to Environmental Impact  
704 in Psychotic Disorder: Brief Theoretical Framework. *Schizophrenia Bulletin*, *42*, sbw049.  
705 <https://doi.org/10.1093/schbul/sbw049>
- 706 Isvoranu, A.-M., van Borkulo, C. D., Boyette, L.-L., Wigman, J. T. W., Vinkers, C. H., Borsboom, D., & Group  
707 Investigators. (2017). A Network Approach to Psychosis: Pathways Between Childhood Trauma and  
708 Psychotic Symptoms. *Schizophrenia Bulletin*, *43*(1), 187–196. <https://doi.org/10.1093/schbul/sbw055>
- 709 Kaiser, H. F. (1974). An index of factorial simplicity. *Psychometrika*, *39*(1), 31–36.  
710 <https://doi.org/10.1007/BF02291575>
- 711 Kemp, K. C., Gross, G. M., & Kwapil, T. R. (2020). Psychometric Properties of the Multidimensional  
712 Schizotypy Scale and Multidimensional Schizotypy Scale–Brief: Item and Scale Test–Retest  
713 Reliability and Concordance of Original and Brief Forms. *Journal of Personality Assessment*, *102*(4),  
714 508–515. <https://doi.org/10.1080/00223891.2019.1591425>
- 715 Kendell, R., & Jablensky, A. (2003). Distinguishing Between the Validity and Utility of Psychiatric Diagnoses.  
716 *American Journal of Psychiatry*, *160*(1), 4–12. <https://doi.org/10.1176/appi.ajp.160.1.4>
- 717 Kotov, R., Krueger, R. F., & Watson, D. (2018). A paradigm shift in psychiatric classification: The Hierarchical  
718 Taxonomy Of Psychopathology (HiTOP). *World Psychiatry*, *17*(1), 24–25.  
719 <https://doi.org/10.1002/wps.20478>
- 720 Kwapil, T. R., Gross, G. M., Burgin, C. J., Raulin, M. L., Silvia, P. J., & Barrantes-Vidal, N. (2018). Validity  
721 of the Multidimensional Schizotypy Scale: Associations with schizotypal traits and normal personality.  
722 *Personality Disorders: Theory, Research, and Treatment*, *9*(5), 458–466.  
723 <https://doi.org/10.1037/per0000288>
- 724 Kwapil, T. R., Gross, G. M., Silvia, P. J., Raulin, M. L., & Barrantes-Vidal, N. (2018). Development and  
725 psychometric properties of the Multidimensional Schizotypy Scale: A new measure for assessing  
726 positive, negative, and disorganized schizotypy. *Schizophrenia Research*, *193*, 209–217.  
727 <https://doi.org/10.1016/j.schres.2017.07.001>
- 728 Lenzenweger, M. F. (2006). Schizotypy: An Organizing Framework for Schizophrenia Research. *Current*  
729 *Directions in Psychological Science*, *15*(4), 162–166. [https://doi.org/10.1111/j.1467-](https://doi.org/10.1111/j.1467-8721.2006.00428.x)  
730 [8721.2006.00428.x](https://doi.org/10.1111/j.1467-8721.2006.00428.x)
- 731 Lenzenweger, M. F. (2015). Thinking Clearly About Schizotypy: Hewing to the Schizophrenia Liability Core,  
732 Considering Interesting Tangents, and Avoiding Conceptual Quicksand. *Schizophrenia Bulletin*,  
733 *41*(suppl\_2), S483–S491. <https://doi.org/10.1093/schbul/sbu184>



- 734 Lenzenweger, M. F. (2018). Schizotypy, schizotypic psychopathology and schizophrenia. *World Psychiatry*,  
735 17(1), 25–26. <https://doi.org/10.1002/wps.20479>
- 736 Martin, E. A., Hua, J. P. Y., Straub, K. T., & Kerns, J. G. (2019). Explicit and implicit affect and judgment in  
737 schizotypy. *Frontiers in Psychology*, 10. <https://doi.org/10.3389/fpsyg.2019.01491>
- 738 Mason, O., & Claridge, G. (2006). The Oxford-Liverpool Inventory of Feelings and Experiences (O-LIFE):  
739 Further description and extended norms. *Schizophrenia Research*, 82(2), 203–211.  
740 <https://doi.org/10.1016/j.schres.2005.12.845>
- 741 Mason, O. J. (2015). The Assessment of Schizotypy and Its Clinical Relevance. *Schizophrenia Bulletin*,  
742 41(suppl\_2), S374–S385. <https://doi.org/10.1093/schbul/sbu194>
- 743 McDonald, R. P. (1999). *Test Theory: A Unified Treatment*. Psychology Press.  
744 <https://doi.org/10.4324/9781410601087>
- 745 Mohr, C., & Claridge, G. (2015). Schizotypy—Do not worry, it is not all worrisome. *Schizophrenia Bulletin*,  
746 41 Suppl 2(Suppl 2), S436–443. <https://doi.org/10.1093/schbul/sbu185>
- 747 Morton, S. E., O’Hare, K. J. M., Maha, J. L. K., Nicolson, M. P., Machado, L., Topless, R., Merriman, T. R.,  
748 & Linscott, R. J. (2017). Testing the Validity of Taxonic Schizotypy Using Genetic and Environmental  
749 Risk Variables. *Schizophrenia Bulletin*, 43(3), 633–643. <https://doi.org/10.1093/schbul/sbw108>
- 750 Muthén, B. (1984). A general structural equation model with dichotomous, ordered categorical, and continuous  
751 latent variable indicators. *Psychometrika*, 49(1), 115–132. <https://doi.org/10.1007/BF02294210>
- 752 Nelson, M. T., Seal, M. L., Pantelis, C., & Phillips, L. J. (2013). Evidence of a dimensional relationship  
753 between schizotypy and schizophrenia: A systematic review. *Neuroscience & Biobehavioral Reviews*,  
754 37(3), 317–327. <https://doi.org/10.1016/j.neubiorev.2013.01.004>
- 755 Nenadić, I., Meller, T., Evermann, U., Schmitt, S., Pfarr, J.-K., Abu-Akel, A., & Grezellschak, S. (2021).  
756 Subclinical schizotypal vs. Autistic traits show overlapping and diametrically opposed facets in a non-  
757 clinical population. *Schizophrenia Research*, 231, 32–41. <https://doi.org/10.1016/j.schres.2021.02.018>
- 758 Oezgen, M., & Grant, P. (2018). Odd and disorganized—Comparing the factor structure of the three major  
759 schizotypy inventories. *Psychiatry Research*, 267, 289–295.  
760 <https://doi.org/10.1016/j.psychres.2018.06.009>
- 761 Onchev, G. (2021). Changes in Psychopathology and Mental Health Resilience. *Frontiers in Psychiatry*, 12,  
762 676492. <https://doi.org/10.3389/fpsyg.2021.676492>
- 763 Pfarr, J.-K., Meller, T., Evermann, U., Sahakyan, L., Kwapil, T. R., & Nenadić, I. (2023). Trait schizotypy and  
764 the psychosis prodrome: Current standard assessment of extended psychosis spectrum phenotypes.  
765 *Schizophrenia Research*, 254, 208–217. <https://doi.org/10.1016/j.schres.2023.03.004>
- 766 Polner, B., Faiola, E., Urquijo, M. F., Meyhöfer, I., Steffens, M., Rónai, L., Koutsouleris, N., & Ettinger, U.  
767 (2021). The network structure of schizotypy in the general population. *European Archives of*  
768 *Psychiatry and Clinical Neuroscience*, 271(4), 635–645. <https://doi.org/10.1007/s00406-019-01078-x>

- 769 Pons, P., & Latapy, M. (2005). Computing Communities in Large Networks Using Random Walks. In pInar  
770 Yolum, T. Güngör, F. Gürgen, & C. Özturan (A c. Di), *Computer and Information Sciences—ISCIS*  
771 *2005* (pp. 284–293). Springer. [https://doi.org/10.1007/11569596\\_31](https://doi.org/10.1007/11569596_31)
- 772 Raine, A. (1991). The SPQ: A Scale for the Assessment of Schizotypal Personality Based on DSM-III-R  
773 Criteria. *Schizophrenia Bulletin*, *17*(4), 555–564. <https://doi.org/10.1093/schbul/17.4.555>
- 774 Rosseel, Y. (2012). lavaan: An R Package for Structural Equation Modeling. *Journal of Statistical Software*,  
775 *48*, 1–36. <https://doi.org/10.18637/jss.v048.i02>
- 776 Sarraf, L., Lepage, M., & Sauvé, G. (2022). The clinical and psychosocial correlates of self-stigma among  
777 people with schizophrenia spectrum disorders across cultures: A systematic review and meta-analysis.  
778 *Schizophrenia Research*, *248*, 64–78. <https://doi.org/10.1016/j.schres.2022.08.001>
- 779 Satorra, A., & Bentler, P. M. (2010). Ensuring Positiveness of the Scaled Difference Chi-square Test Statistic.  
780 *Psychometrika*, *75*(2), 243–248. <https://doi.org/10.1007/s11336-009-9135-y>
- 781 Schmittmann, V. D., Cramer, A. O. J., Waldorp, L. J., Epskamp, S., Kievit, R. A., & Borsboom, D. (2013).  
782 Deconstructing the construct: A network perspective on psychological phenomena. *New Ideas in*  
783 *Psychology*, *31*(1), 43–53. <https://doi.org/10.1016/j.newideapsych.2011.02.007>
- 784 Schultze-Lutter, F., Nenadic, I., & Grant, P. (2019). Psychosis and Schizophrenia-Spectrum Personality  
785 Disorders Require Early Detection on Different Symptom Dimensions. *Frontiers in Psychiatry*, *10*.  
786 <https://doi.org/10.3389/fpsy.2019.00476>
- 787 Strobl, R., Grill, E., & Mansmann, U. (2012). Graphical modeling of binary data using the LASSO: A  
788 simulation study. *BMC Medical Research Methodology*, *12*, 16. [https://doi.org/10.1186/1471-2288-](https://doi.org/10.1186/1471-2288-12-16)  
789 [12-16](https://doi.org/10.1186/1471-2288-12-16)
- 790 Tandon, R., Gaebel, W., Barch, D. M., Bustillo, J., Gur, R. E., Heckers, S., Malaspina, D., Owen, M. J., Schultz,  
791 S., Tsuang, M., Van Os, J., & Carpenter, W. (2013). Definition and description of schizophrenia in the  
792 DSM-5. *Schizophrenia Research*, *150*(1), 3–10. <https://doi.org/10.1016/j.schres.2013.05.028>
- 793 *[The German version of the Childhood Trauma Questionnaire (CTQ): Preliminary psychometric properties]*—  
794 *PubMed*. (s.d.). Recuperato 18 giugno 2024, da <https://pubmed.ncbi.nlm.nih.gov/20200804/>
- 795 van Borkulo, C. D., Borsboom, D., Epskamp, S., Blanken, T. F., Boschloo, L., Schoevers, R. A., & Waldorp,  
796 L. J. (2014). A new method for constructing networks from binary data. *Scientific Reports*, *4*(1), 5918.  
797 <https://doi.org/10.1038/srep05918>
- 798 Wingefeld, K., Spitzer, C., Mensebach, C., Grabe, H. J., Hill, A., Gast, U., Schlosser, N., Höpp, H., Beblo,  
799 T., & Driessen, M. (2010). Die deutsche Version des Childhood Trauma Questionnaire (CTQ): Erste  
800 Befunde zu den psychometrischen Kennwerten. *PPmP - Psychotherapie · Psychosomatik ·*  
801 *Medizinische Psychologie*, *60*, 442–450. <https://doi.org/10.1055/s-0030-1247564>
- 802 Wright, A. G. C., Krueger, R. F., Hobbs, M. J., Markon, K. E., Eaton, N. R., & Slade, T. (2013). The structure  
803 of psychopathology: Toward an expanded quantitative empirical model. *Journal of Abnormal*  
804 *Psychology*, *122*(1), 281–294. <https://doi.org/10.1037/a0030133>

EGA model of the MSS – 4 FACTORS + Betweenness centrality

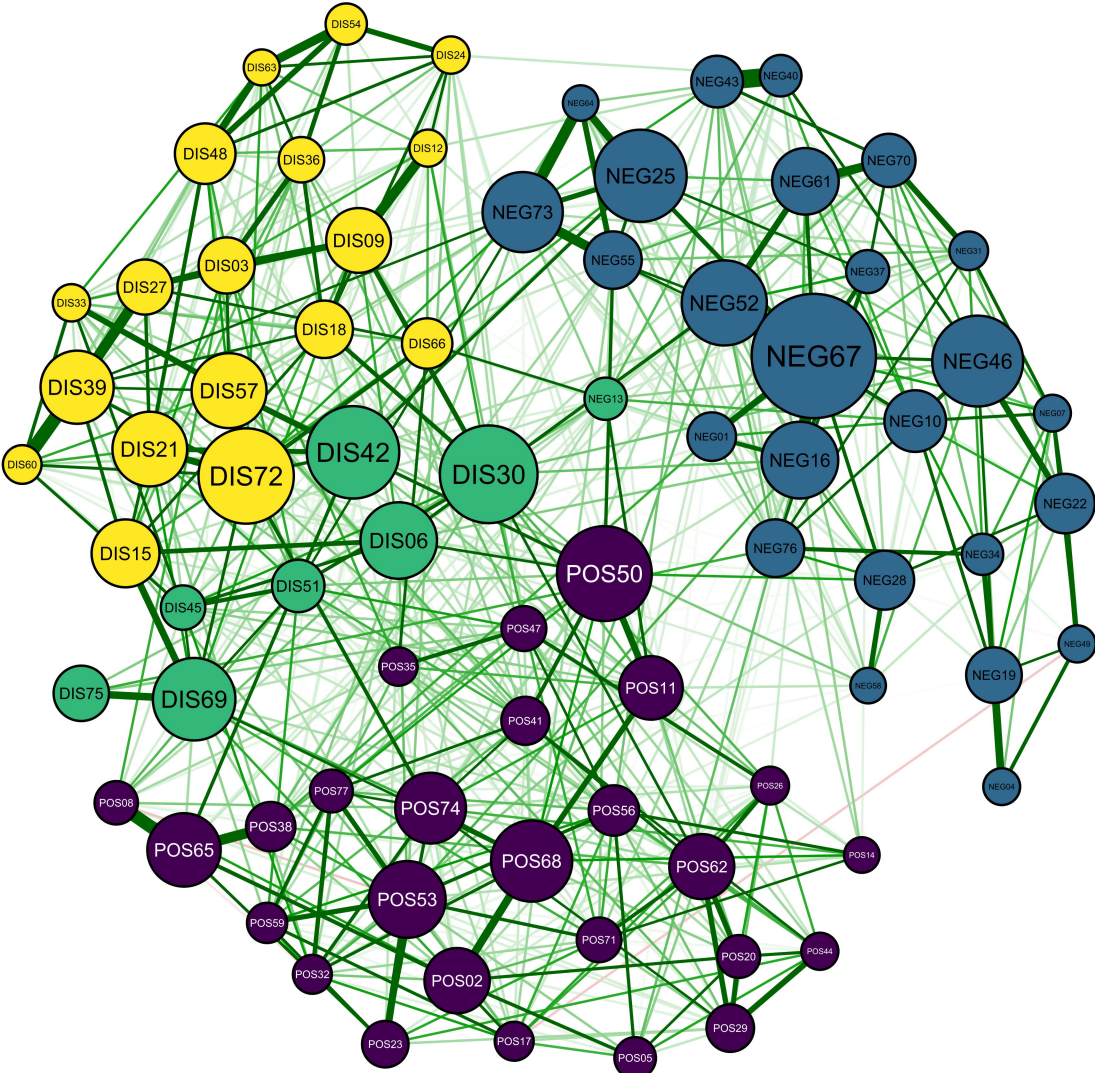

- Disconnection
- Disorganised
- Negative
- Positive



EGA model of the O-LIFE highlighting 4 factors (original model)

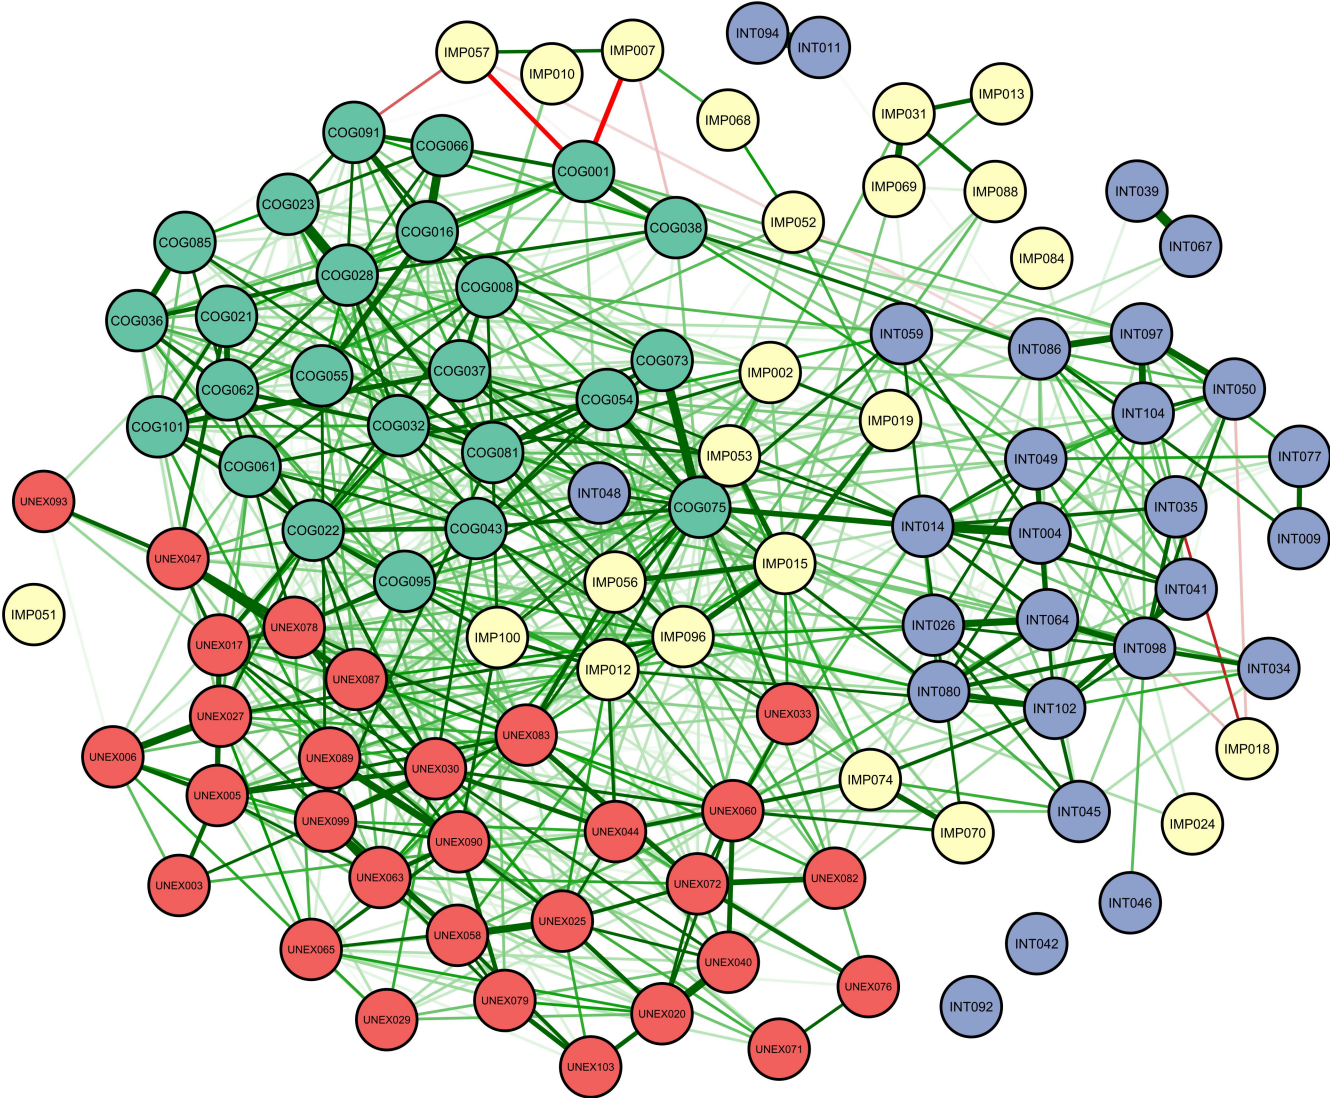

- Cognitive disorganisation
- Impulsive Nonconformity
- Introverted Anhedonia
- Unusual Experiences

EGA model of the O-LIFE – new 4 factors

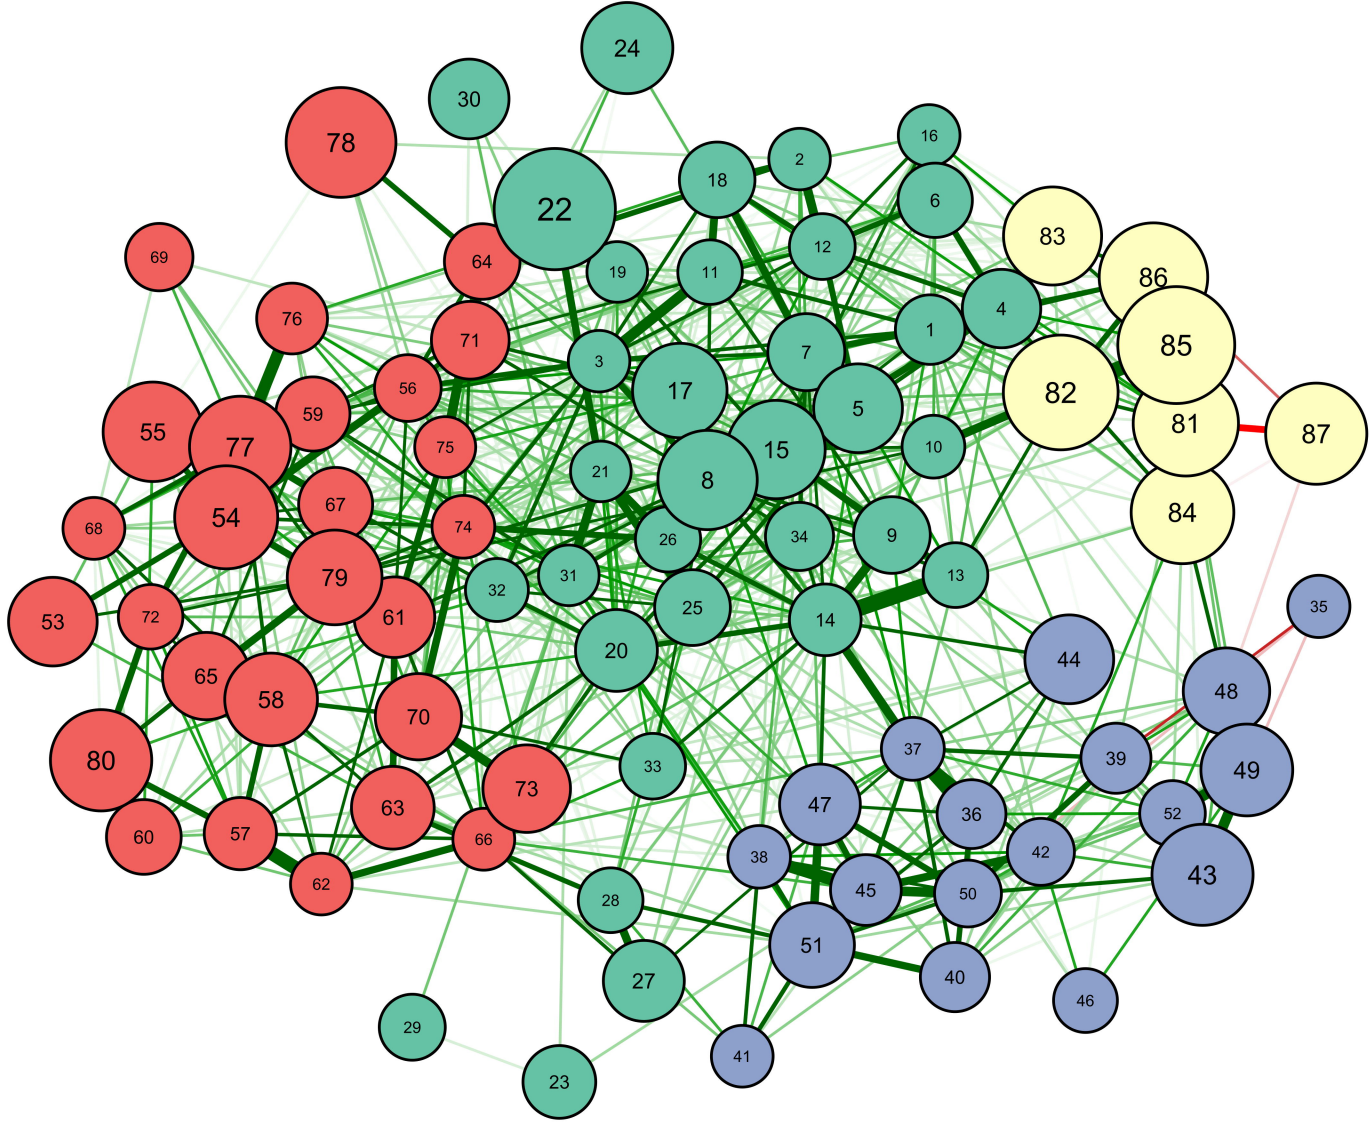

- Cognitive and behavioural disorganization
- Environmental pressure
- Introversion
- Unusual experiences
